# Supplementary material
Source: HighWire-hosted journal article supplement (https://bmjopen.bmj.com/content/12/3/e052000)
Supplement: inline-supplementary-material-1 [file inline-supplementary-material-1.pdf]

***Supplemental Table: Multivariate associations with 30-day MACE and 12-month mortality in the entire STEMI cohort***

|                                                          | 30-day MACE |             |                         | 12-month mortality |              |                         |
|----------------------------------------------------------|-------------|-------------|-------------------------|--------------------|--------------|-------------------------|
|                                                          | OR          | 95% CI      | <i>P value</i>          | OR                 | 95% CI       | <i>P value</i>          |
| Age, each year increase                                  | 1.01        | 1.00 - 1.02 | <b><i>0.03</i></b>      | 1.03               | 1.02 - 1.05  | <b><i>&lt;0.001</i></b> |
| Female sex                                               | 1.08        | 0.85 - 1.38 | <b><i>0.52</i></b>      | 1.17               | 0.89 - 1.54  | <b><i>0.26</i></b>      |
| Diabetes                                                 | 1.07        | 0.82 - 1.39 | <b><i>0.61</i></b>      | 1.15               | 0.85 - 1.55  | <b><i>0.37</i></b>      |
| Previous CABG or PCI                                     | 1.41        | 1.09 - 1.82 | <b><i>0.009</i></b>     | 1.20               | 0.98 - 0.99  | <b><i>0.26</i></b>      |
| Pre-procedural eGFR                                      | 0.99        | 0.99 - 0.99 | <b><i>&lt;0.001</i></b> | 0.98               | 0.98 - 0.99  | <b><i>&lt;0.001</i></b> |
| Cardiogenic shock or cardiac arrest requiring intubation | 7.76        | 6.21 - 9.68 | <b><i>&lt;0.001</i></b> | 10.09              | 7.78 - 13.08 | <b><i>&lt;0.001</i></b> |
| Severe LVEF impairment                                   | 4.71        | 3.53 - 6.30 | <b><i>&lt;0.001</i></b> | 7.49               | 5.31 - 10.54 | <b><i>&lt;0.001</i></b> |
| Symptom onset in-hospital                                | 1.91        | 1.38 - 2.64 | <b><i>&lt;0.001</i></b> | 1.88               | 1.29 - 2.73  | <b><i>&lt;0.001</i></b> |

CABG, coronary artery bypass grafting; eGFR, estimated glomerular filtration rate; MACE, major adverse cardiovascular events; LVEF, left ventricular ejection fraction; PCI, percutaneous coronary intervention; STEMI, ST elevation myocardial infarction;

STEMI cohort included in this analysis is only those patients who presented within 12 hours and without inter-hospital transfer.
